# Supplementary material for: Pt-doped MnO x /AC catalyst for enhanced catalytic performance of formaldehyde at ambient temperature
Source: Research Square preprint supplement (doi:10.21203/rs.3.rs-7314187/v1), 2025-09-01
Supplement: Supplementary file 1 [file 608fefe17156a59e373cda64.docx]

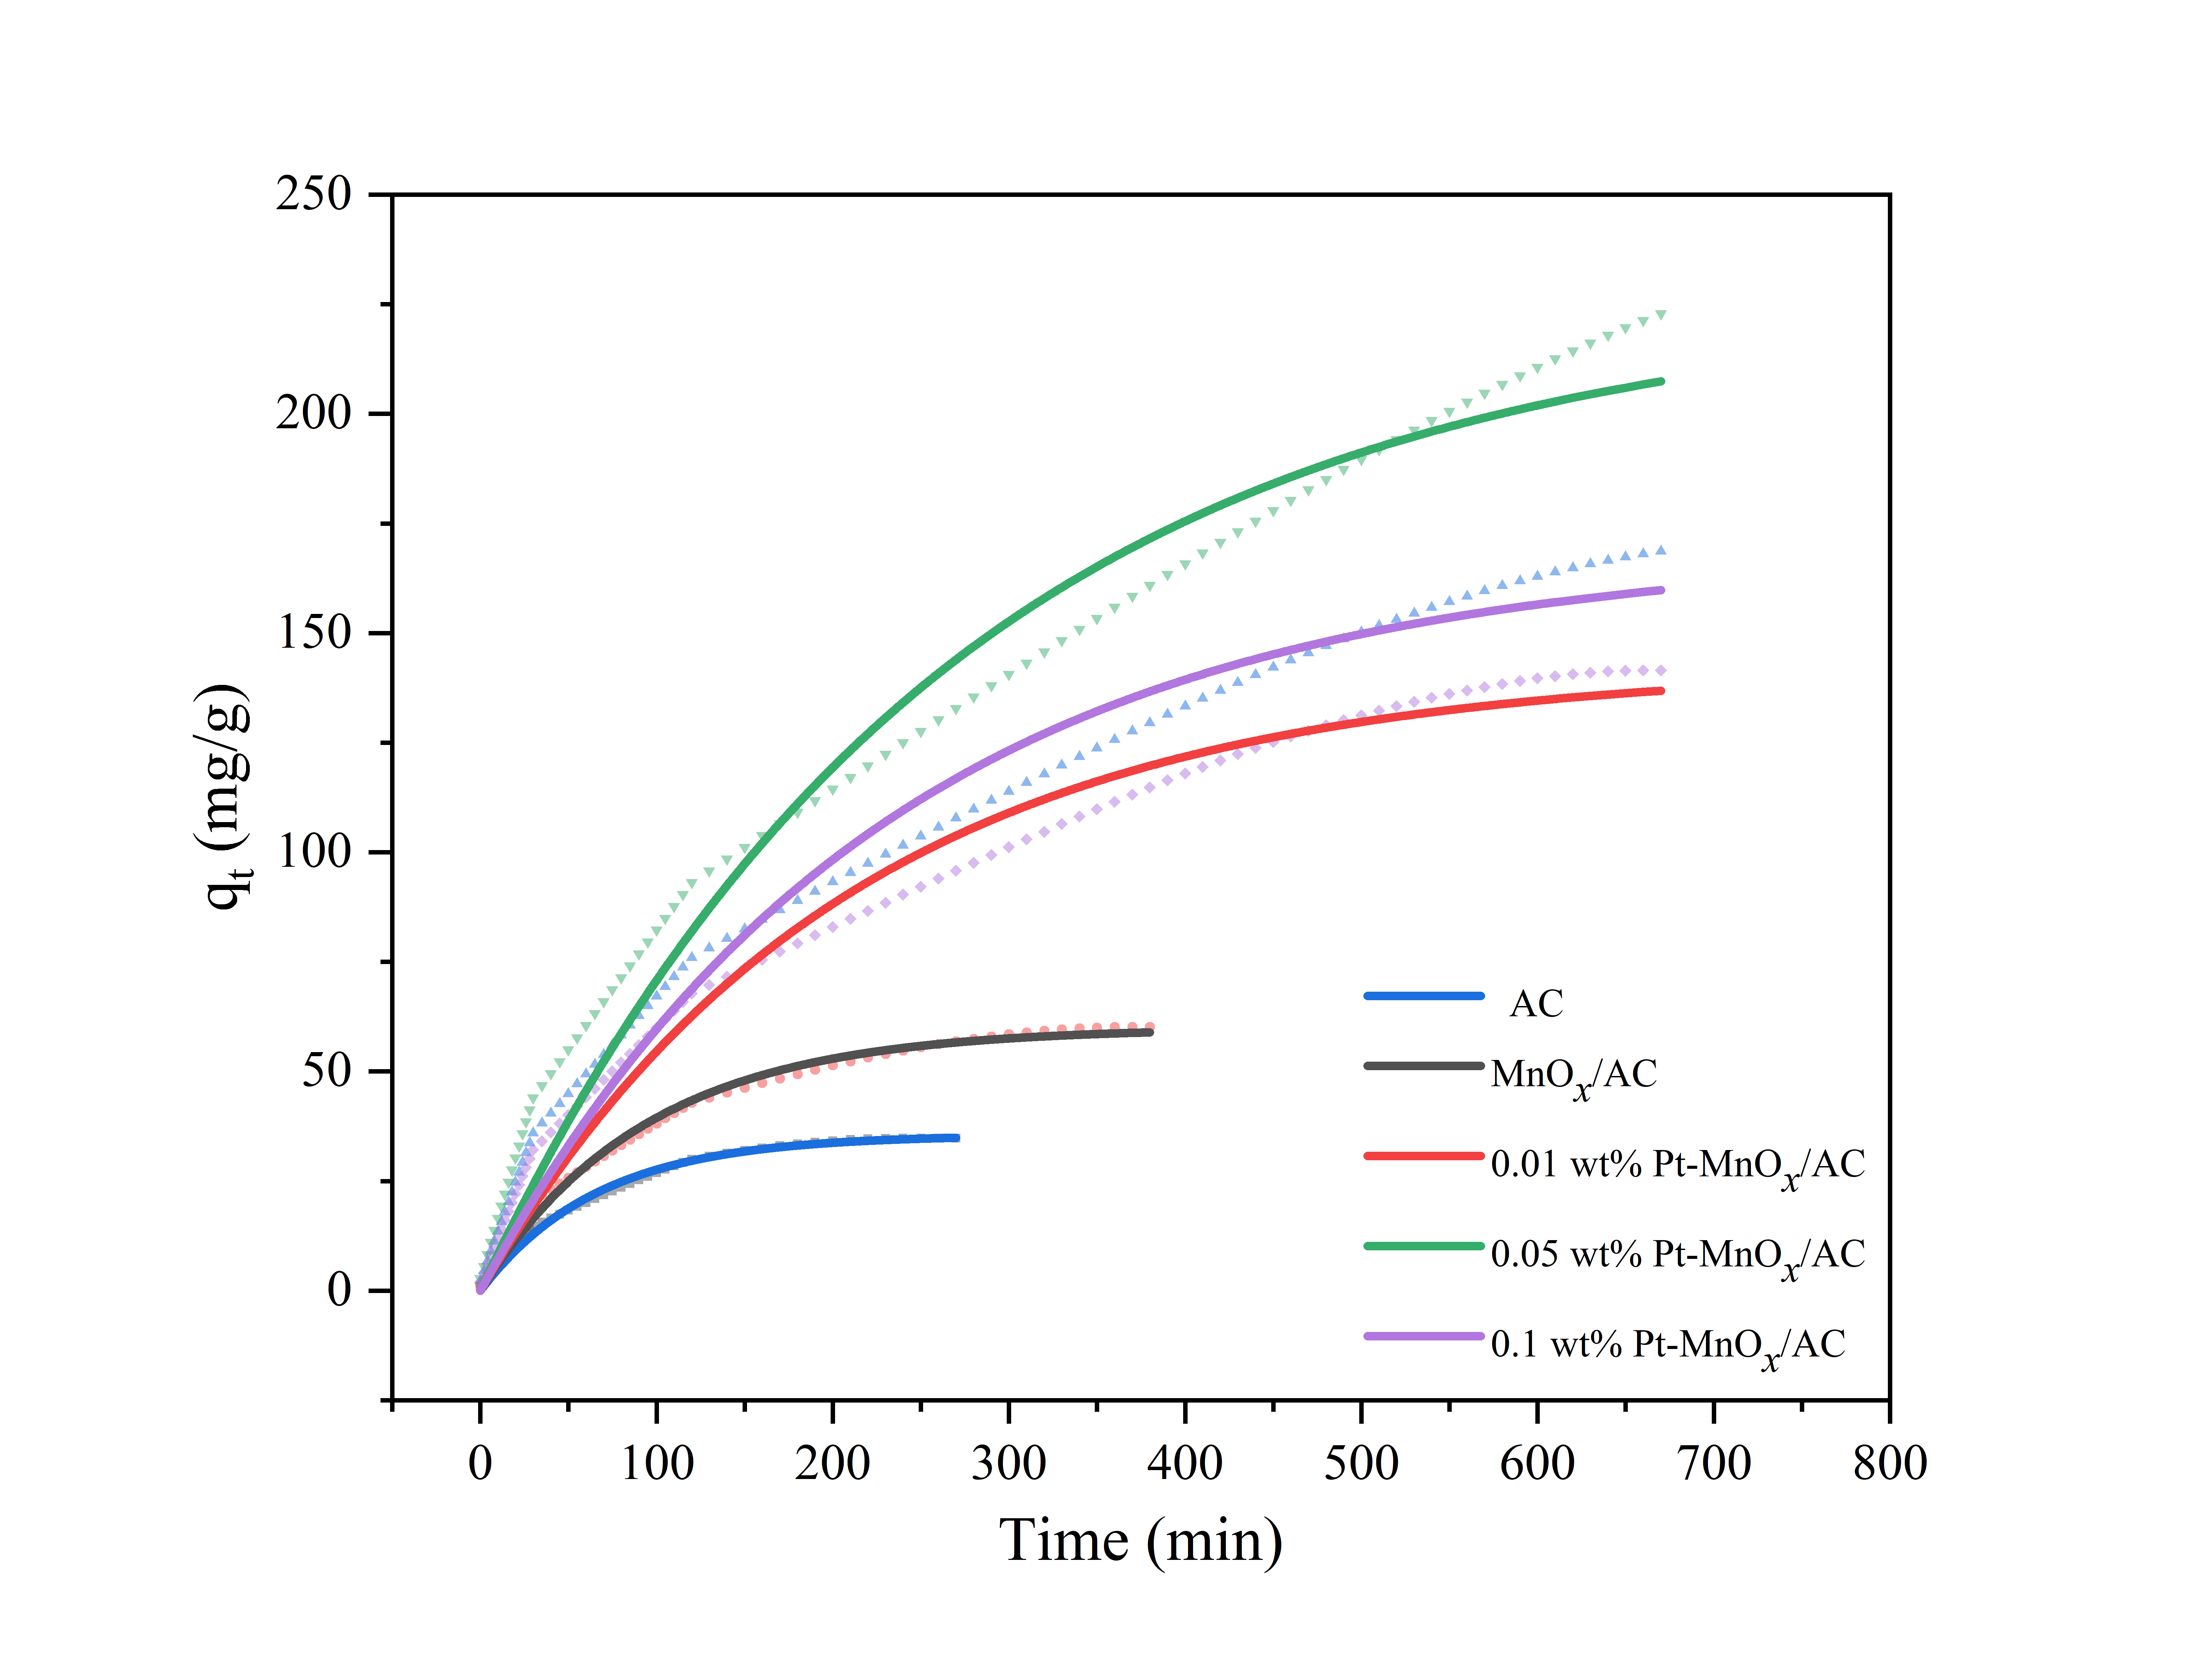


Figure S1 Fitting results of pseudo-first-order kinetic model for dynamic experimental data

Table S1 Fitting parameters values of pseudo-first-order kinetic model

| Catalysts | *K1* (min-1) | *qe* (mg/g) | R2 |
| --- | --- | --- | --- |
| AC | 0.0150±0.00035 | 35.5034±0.3145 | 0.9945 |
| MnO*x*/AC | 0.0107±0.00028 | 59.9489±0.5661 | 0.9917 |
| 0.01 wt% Pt-MnO*x*/AC | 0.0048±0.00019 | 142.4533±2.1111 | 0.9797 |
| 0.05 wt% Pt-MnO*x*/AC | 0.0038±0.00020 | 225.4634±5.1506 | 0.9734 |
| 0.1 wt% Pt-MnO*x*/AC | 0.0044±0.00019 | 168.8455±3.0087 | 0.9769 |
